# Supplementary material
Source: publisher site journal article supplement (https://zoologia.pensoft.net/article/23539/download/suppl/32/)
Supplement: Supplementary file 1

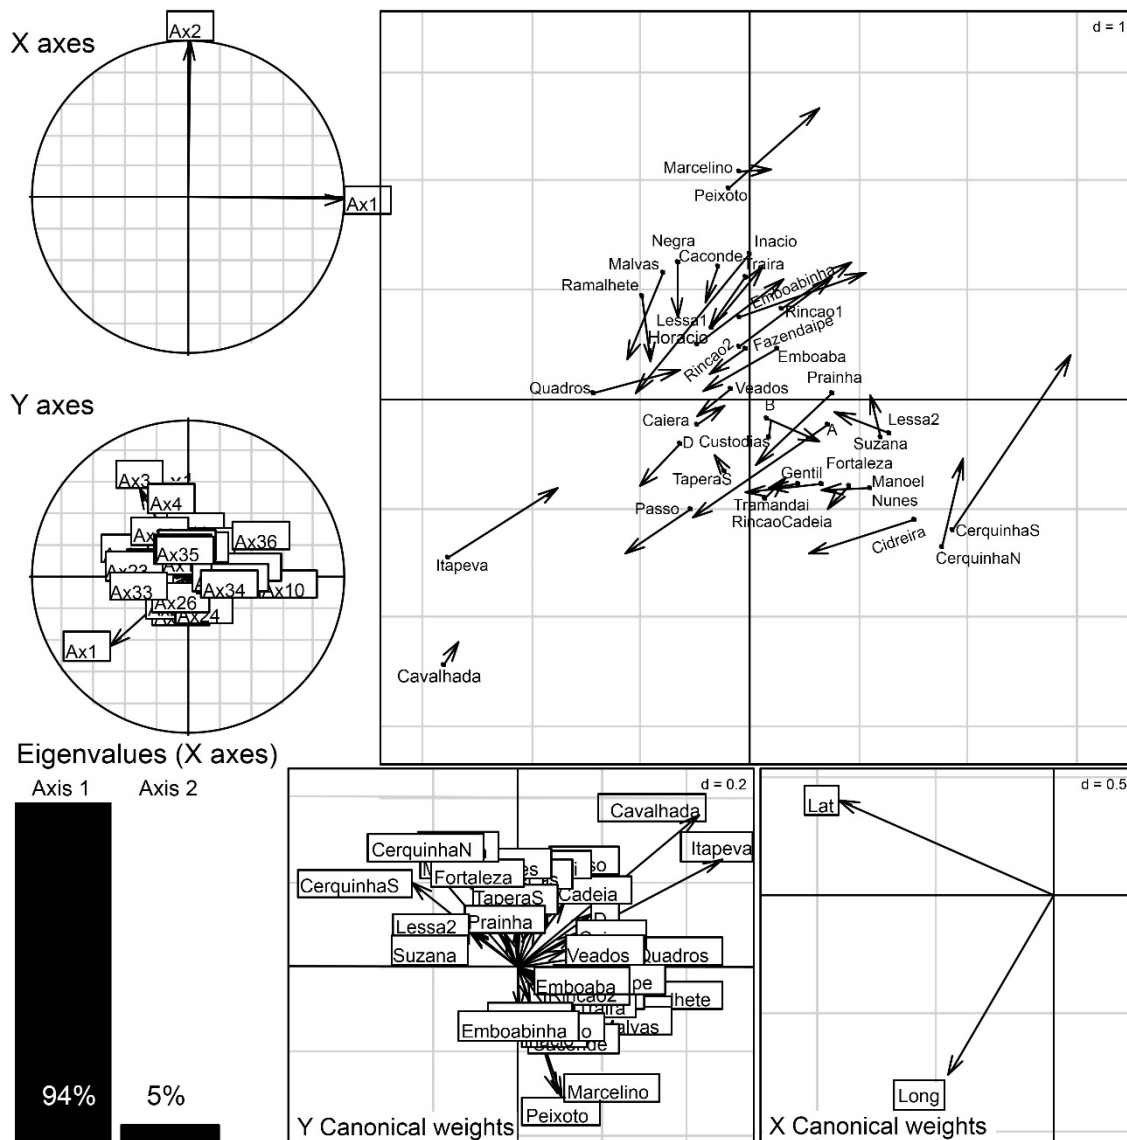

Supplementary file S2. The upper right-hand plot shows the position of the sites on the co-inertia axes using the functional dissimilarity (origins of the arrows) and spatial distances (arrowheads) between lakes. Short arrows indicate a better concordance between the two projections. Most of the variation in the between-lake distances was related to latitude (as latitude was related to the first ordination axis that explained 95% of the total variation). For Y Canonical Weights (bottom graph), the lakes farthest from the ordination centroid are the lakes with the highest functional dissimilarity.
